# Supplementary material for: Molecular Epidemiology and Genetic Diversity of Human Respiratory Syncytial Virus in Sicily during Pre- and Post-COVID-19 Surveillance Seasons
Source: MDPI journal article supplement (doi:10.3390/pathogens12091099), 2023-08-28
Supplement: s1 [file s1]

**Table S4.** Amino acid changes identified in the Sicilian dataset of hRSV-B protein G gene sequences, according to the surveillance season. Within each season, cells shaded by pin color mean codon changes observed at low frequency (30% - 50%), whereas cells highlighted by violet color refer to codon changes observed at high frequency (>50%) Deduced amino acid changes and position are defined in comparison with the BA9 prototype strain BA4128/99B (GenBank accession number: AY333364).

| HRSV-B      |   | SURVEILLANCE SEASON |         |         |         |         |         |         |         |
|-------------|---|---------------------|---------|---------|---------|---------|---------|---------|---------|
| AA position |   | 2015/16             | 2016/17 | 2017/18 | 2018/19 | 2019/20 | 2020/21 | 2021/22 | 2022/23 |
| 5           | K |                     |         |         | S       |         |         |         |         |
| 6           | N |                     |         |         |         |         |         |         | R       |
| 18          | D |                     |         |         | N       |         |         |         |         |
| 57          | A |                     |         |         |         |         |         |         | T       |
| 69          | V | I                   |         |         |         |         |         |         |         |
| 74          | V | I                   |         |         |         |         |         |         |         |
| 76          | V | I                   | I       |         |         |         |         |         |         |
| 87          | I | T                   | M       |         |         |         |         |         |         |
| 90          | Y | H                   |         |         |         |         |         |         |         |
| 91          | L | F/P                 | F       |         |         |         |         |         |         |
| 94          | V |                     |         |         | I       |         |         |         |         |
| 97          | R |                     |         |         |         | D       |         |         |         |
| 98          | R |                     |         |         | K       |         |         |         |         |
| 99          | V | A                   |         |         |         |         |         |         |         |
| 100         | S | N                   |         |         |         |         |         | G       | G       |
| 102         | S |                     | P       |         |         |         |         |         |         |
| 105         | L | P                   | P       | P       | P       | P       |         | P       | P       |
| 106         | T |                     |         |         |         |         |         |         | I       |
| 107         | T | A                   | A/D     | A       | A       | A       |         | A       | A       |
| 108         | T | P                   |         |         |         |         |         |         | A       |
| 109         | P | S                   |         |         | S       |         |         |         | Q/S     |
| 110         | P |                     | L/S     |         |         |         |         |         |         |
| 112         | Y | H                   | H       | H/Q     | H       | H       |         | H       | H       |
| 113         | T |                     | M       |         | I       |         |         |         |         |
| 115         | S | L                   |         | P       |         |         |         |         |         |
| 116         | A |                     | T       |         |         | T       |         | T       |         |
| 117         | T | A                   |         |         |         |         |         |         |         |
| 118         | I |                     | T       |         |         |         |         |         |         |
| 120         | P | T                   |         |         |         |         |         |         |         |
| 121         | N |                     |         |         | T       |         |         |         |         |
| 122         | T | A                   |         |         |         |         |         |         |         |
| 124         | S |                     |         |         |         |         |         | L       |         |
| 126         | T |                     | A       |         | A       |         |         |         |         |

| HRSV-B      |   | SURVEILLANCE SEASON |         |         |         |         |         |         |         |
|-------------|---|---------------------|---------|---------|---------|---------|---------|---------|---------|
| AA position |   | 2015/16             | 2016/17 | 2017/18 | 2018/19 | 2019/20 | 2020/21 | 2021/22 | 2022/23 |
| 128         | H |                     |         |         | Y       |         |         |         |         |
| 129         | T |                     |         |         |         | K       |         |         |         |
| 130         | T | I                   |         |         |         |         |         |         | I       |
| 131         | A |                     |         | T       | T       | T       |         | T       |         |
| 133         | T |                     |         |         |         |         |         |         | A       |
| 135         | G | D                   | S       |         |         |         |         |         | S       |
| 136         | R | T                   | I/T     | T       | T       | T       |         | T       | T       |
| 137         | T |                     |         | I       | I       | I       |         | I       |         |
| 138         | T | S                   | S       | S       | S       | S       |         | S       | S       |
| 140         | P |                     | S       |         |         | L       |         |         |         |
| 142         | Q | H                   | K       |         |         |         |         |         |         |
| 143         | N | S                   |         |         | K       |         |         |         |         |
| 144         | N |                     |         |         | H       |         |         |         |         |
| 149         | K |                     | E       |         |         |         |         |         |         |
| 152         | P | S                   |         |         |         |         |         |         |         |
| 154         | N | K                   | K       |         | K       |         |         |         |         |
| 156         | P | S                   | S       |         |         |         |         |         |         |
| 157         | K | *                   | *       | *       | *       | *       |         | *       | *       |
| 159         | K | *                   | *       | *       | *       | *       |         | *       | *       |
| 171         | V |                     | I       |         |         |         |         |         |         |
| 174         | S |                     |         |         |         | G       |         |         |         |
| 175         | I | V                   |         |         |         |         |         |         |         |
| 177         | G |                     |         |         |         | S       |         |         |         |
| 192         | N |                     | S       |         |         |         |         |         |         |
| 194         | P |                     |         | Q       |         |         |         |         |         |
| 199         | T |                     |         |         |         |         |         |         | A       |
| 200         | I | T                   | T       | T       | T       | T       |         | T       | T       |
| 204         | N | T                   | K/T     |         |         |         |         |         |         |
| 205         | K |                     | Q       |         |         |         |         |         |         |
| 206         | P |                     |         |         | S       |         |         |         |         |
| 207         | P | T                   |         |         |         |         |         |         |         |
| 209         | K | E                   |         |         |         |         |         |         |         |
| 211         | T |                     |         |         |         |         |         | K       |         |
| 212         | N |                     | T       |         |         |         |         |         |         |
| 213         | K | E                   |         |         |         |         |         |         |         |
| 214         | R | K                   |         |         |         |         |         |         |         |
| 215         | D |                     | H       | Y       |         |         |         |         |         |
| 216         | P | L                   | S       |         |         |         |         | S       | S       |

| HRSV-B      |   | SURVEILLANCE SEASON |         |         |         |         |         |         |         |
|-------------|---|---------------------|---------|---------|---------|---------|---------|---------|---------|
| AA position |   | 2015/16             | 2016/17 | 2017/18 | 2018/19 | 2019/20 | 2020/21 | 2021/22 | 2022/23 |
| 217         | K | I                   |         |         |         |         |         |         |         |
| 218         | K | T                   | T       | T       | T       | T       |         | T       | P/T     |
| 219         | L | P                   | P       | P       | P       |         |         |         |         |
| 220         | A |                     | S       |         |         |         |         |         |         |
| 222         | T |                     | P       |         |         |         |         |         |         |
| 223         | L | M/P/T               | P/S/T   | P       | P       | P/S     |         | P       |         |
| 224         | K | E                   |         |         |         |         |         |         |         |
| 225         | K | E                   |         |         |         |         |         |         |         |
| 227         | T | N                   | N       |         | A/N     |         |         |         | N       |
| 228         | T | A                   |         | A       | A       |         |         |         |         |
| 229         | I |                     | T       |         | T       |         |         | T       |         |
| 231         | P | S                   |         | L       | L       |         |         |         |         |
| 232         | T |                     |         |         |         |         |         |         | A       |
| 233         | K |                     | R       |         |         |         |         |         |         |
| 234         | K |                     |         | N       |         |         |         |         |         |
| 236         | T |                     |         |         | I       |         |         |         |         |
| 237         | P |                     | S       | L       | L       |         |         |         |         |
| 239         | T |                     | I       |         |         |         |         |         |         |
| 240         | T | K                   | K       |         |         |         |         |         |         |
| 243         | D | N                   |         | G       |         |         |         |         |         |
| 244         | T |                     |         |         |         | S       |         |         |         |
| 245         | S |                     | N       |         |         |         |         |         |         |
| 247         | S | P                   | P       | P       | P       | P       |         | P       | P       |
| 249         | S | P                   |         |         |         |         |         |         |         |
| 251         | V | A                   | A       | M       |         |         |         |         |         |
| 252         | L |                     | F/P     |         |         |         |         |         |         |
| 254         | T | I                   | I       | I       | I       | I       |         |         |         |
| 255         | T |                     |         | N       |         |         |         |         |         |
| 256         | T |                     | I       | S       | S       |         |         |         |         |
| 257         | S |                     |         | P       |         |         |         |         |         |
| 258         | K |                     | N/R     |         | N       |         |         | N       | N       |
| 259         | H |                     | Q       |         |         |         |         |         |         |
| 260         | T |                     |         |         |         |         |         |         | K       |
| 261         | E | K                   | K       |         |         |         |         |         |         |
| 263         | D |                     | E/Y     |         |         |         |         |         | N       |
| 267         | S | P                   |         | L/P     | P       |         |         | P       |         |
| 269         | S | F                   | F       |         |         |         |         |         |         |
| 270         | T | I                   | A/I     | I       | I       | I       |         |         |         |

| HRSV-B      |   | SURVEILLANCE SEASON |         |         |         |         |         |         |         |
|-------------|---|---------------------|---------|---------|---------|---------|---------|---------|---------|
| AA position |   | 2015/16             | 2016/17 | 2017/18 | 2018/19 | 2019/20 | 2020/21 | 2021/22 | 2022/23 |
| 271         | V | A                   | A       | A       | A       | A       |         | A       | A       |
| 272         | L | F/P                 |         | P       |         |         |         | P       |         |
| 277         | S |                     |         |         |         |         |         | P       | P       |
| 281         | I | T                   | T       | T       | T       | T       |         | T       | T       |
| 282         | Q |                     |         |         |         |         |         |         | L       |
| 284         | Q |                     |         | L       |         |         |         |         |         |
| 285         | S | F/P                 | P       |         |         |         |         |         |         |
| 286         | L |                     | P       | P       |         |         |         |         |         |
| 287         | H | Y                   | Y       | Y       | Y       | Y       |         | Y       |         |
| 290         | T |                     | I       | I       | I       | I       |         | I       | I       |
| 291         | P | S                   |         |         |         |         |         |         |         |
| 292         | E |                     |         |         | K       |         |         | Q       |         |
| 296         | N |                     |         | F       |         |         |         |         | S       |
| 297         | S |                     | M       |         |         |         |         |         |         |
| 302         | T |                     |         |         | I       |         |         |         | A       |
| 303         | A | T                   | P/T     | P       |         |         |         |         |         |
| 304         | S |                     |         | F       |         |         |         |         |         |
| 305         | E |                     | D       | K       |         |         |         | K       | K       |
| 306         | P | S                   |         |         |         |         |         |         |         |
| 307         | S |                     | Y       |         | P       |         |         |         |         |
| 308         | T |                     | I       |         |         |         |         |         |         |
| 309         | S |                     | P       |         |         |         |         |         |         |
| 312         | T | N                   | A       | I       | I       | I/F     |         | I       | I       |
| 313         | Q | *                   | *       | *       | *       | *       |         | *       | *       |
| 314         | K | R                   | R       | R       | R       | R       |         | R       |         |
| 316         | * | Q                   | Q       | Q       | Q       | Q       |         | Q       | Q       |
| 317         | S | P                   |         |         |         |         |         |         |         |
| 318         | Y |                     |         |         | C       |         |         |         |         |
| 322         | F | S                   | I       |         |         |         |         |         |         |
