# Supplementary material for: Molecular Epidemiology and Genetic Diversity of Human Respiratory Syncytial Virus in Sicily during Pre- and Post-COVID-19 Surveillance Seasons
Source: MDPI journal article supplement (doi:10.3390/pathogens12091099), 2023-08-28
Supplement: s1 [file s1]

**Table S2.** Amino acid changes identified in the Sicilian dataset of hRSV-A protein G gene sequences, according to the surveillance season. Within each season, cells shaded by pin color mean codon changes observed at low frequency (30% - 50%), whereas cells highlighted by violet color refer to codon changes observed at high frequency (>50%) Deduced amino acid changes and position are defined in comparison with the ON1 prototype strain ON67-1210A (GenBank accession number: JN257693).

| hRSV-A      |   | SURVEILLANCE SEASON |         |         |         |         |         |         |         |
|-------------|---|---------------------|---------|---------|---------|---------|---------|---------|---------|
| AA position |   | 2015/16             | 2016/17 | 2017/18 | 2018/19 | 2019/20 | 2020/21 | 2021/22 | 2022/23 |
| 7           | Q |                     |         | R       | L       |         |         |         |         |
| 9           | T |                     |         | A       |         |         |         |         |         |
| 26          | I | T                   |         |         |         |         |         |         |         |
| 57          | A |                     |         |         |         |         |         | V       | V       |
| 67          | H | N                   |         |         | Q       | N       |         |         |         |
| 69          | V |                     |         |         |         | F       |         |         |         |
| 71          | L | P                   |         |         |         | P       |         |         |         |
| 78          | D | N                   |         |         |         |         |         |         |         |
| 80          | T |                     | A       |         |         |         |         |         | M       |
| 82          | Q |                     |         |         |         |         |         | R       |         |
| 86          | T |                     |         |         | I       |         |         |         |         |
| 93          | Q | L                   |         |         |         |         |         |         |         |
| 98          | G |                     | E       |         |         |         |         |         |         |
| 99          | I | T                   |         |         |         |         |         |         |         |
| 100         | S | N                   |         |         |         |         |         |         |         |
| 101         | F |                     |         |         |         | L       |         | S       | S       |
| 102         | S | F/T                 | F       |         |         | F       |         |         |         |
| 106         | G |                     | E       |         | E       |         |         |         |         |
| 107         | T |                     |         | A       |         |         |         |         |         |
| 108         | T |                     |         |         |         | I       |         |         |         |
| 111         | S | P                   | F       |         |         | P       |         |         |         |
| 113         | T |                     |         |         | I       | I       |         | I       | I       |
| 114         | I |                     |         | T       |         |         |         |         |         |
| 115         | L | P                   | P       |         |         |         |         |         |         |
| 120         | P |                     |         |         |         |         |         |         | L       |
| 128         | S |                     | P/T     |         |         |         |         |         |         |
| 130         | T |                     | I       |         | I       |         |         |         |         |
| 131         | V |                     |         |         | D       | D/I     |         | D       | D       |
| 132         | K | E                   |         |         |         |         |         |         |         |
| 133         | I |                     | T       |         |         | V       |         |         |         |
| 134         | K | I                   | I       | I       | I       | I       |         |         |         |
| 135         | N |                     | K       |         |         |         |         | T       |         |
| 137         | T |                     |         | A       |         | A       |         |         |         |

| hRSV-A      |   | SURVEILLANCE SEASON |         |         |         |         |         |         |         |
|-------------|---|---------------------|---------|---------|---------|---------|---------|---------|---------|
| AA position |   | 2015/16             | 2016/17 | 2017/18 | 2018/19 | 2019/20 | 2020/21 | 2021/22 | 2022/23 |
| 140         | Q |                     |         |         |         |         |         |         | R       |
| 142         | L |                     | S       |         | S       | S       |         |         | S       |
| 144         | S |                     |         |         |         | I       |         |         |         |
| 146         | P | T                   |         |         |         | S       |         | L       | S       |
| 147         | T |                     | I       |         |         |         |         |         |         |
| 149         | K |                     |         |         | R       |         |         |         |         |
| 151         | R | H                   |         |         | H       |         |         | H       | H       |
| 152         | Q |                     |         |         |         |         |         |         | K       |
| 154         | K | R                   |         |         |         |         |         |         |         |
| 161         | N |                     |         |         |         | D       |         |         |         |
| 163         | F |                     | L       |         |         |         |         |         |         |
| 173         | C | W                   |         |         |         |         |         |         |         |
| 178         | N |                     | D       |         | G       | G       |         | G       | G       |
| 193         | K |                     | R       |         |         |         |         |         |         |
| 200         | T |                     |         | I/P     | P       |         |         |         |         |
| 206         | P |                     | Q       | Q       |         | Q       |         | Q       |         |
| 209         | K |                     | R       |         |         | R       |         | R       | R       |
| 210         | T |                     | I       |         |         | S       |         |         |         |
| 214         | D |                     | E       |         |         |         |         |         |         |
| 215         | P |                     |         | L       | L/S     |         |         |         |         |
| 216         | K | N/R                 | N       |         | N       | N       |         |         |         |
| 222         | P | L                   |         |         |         |         |         |         | L       |
| 224         | E | G                   |         |         | K       | V       |         |         | V       |
| 225         | V | A                   | A       |         | A       |         |         | A       | A       |
| 226         | L |                     |         | F       |         | P       |         | F       |         |
| 227         | T |                     |         | I       |         |         |         |         |         |
| 230         | P | T                   |         |         |         |         |         | T       | T       |
| 231         | T | A                   |         |         |         |         |         |         |         |
| 232         | G |                     | R       |         | R       |         |         |         |         |
| 234         | P |                     |         |         |         | L       |         |         | L       |
| 235         | T |                     |         |         |         | A       |         |         |         |
| 239         | T |                     | A       |         |         |         |         |         |         |
| 240         | K |                     |         |         |         | R       |         |         | E       |
| 241         | T |                     | P       |         |         |         |         |         |         |
| 243         | I | S                   | S       | S       | S       | S       |         |         |         |
| 245         | T |                     |         |         |         |         |         |         | A       |
| 247         | L | Q                   |         |         | P       | P       |         |         | P       |
| 248         | L |                     | I       | I       |         | I       |         | I       | I       |

| hRSV-A      |   | SURVEILLANCE SEASON |         |         |         |         |         |         |         |
|-------------|---|---------------------|---------|---------|---------|---------|---------|---------|---------|
| AA position |   | 2015/16             | 2016/17 | 2017/18 | 2018/19 | 2019/20 | 2020/21 | 2021/22 | 2022/23 |
| 249         | T |                     |         |         | N       |         |         |         |         |
| 250         | S |                     |         |         |         |         |         | F       | F       |
| 253         | K |                     | R       |         |         |         |         |         |         |
| 254         | G |                     |         |         |         | R       |         |         | E       |
| 255         | N |                     |         | D       | D/S     |         |         |         |         |
| 256         | P |                     | S       |         |         |         |         |         |         |
| 257         | E | K                   |         |         |         |         |         |         |         |
| 258         | H |                     | Y       |         | Q       | Q       |         | Q       | Q       |
| 262         | E | K                   | K       | K       | K       | K       |         |         |         |
| 263         | E | G                   |         |         |         | G       |         | K       | K       |
| 265         | L | I                   |         |         | F       | F       |         |         |         |
| 266         | H |                     |         |         | L       | L       |         | L       | L       |
| 267         | S |                     |         | L       |         |         |         |         | L       |
| 270         | S | F                   | Y       |         |         | P       |         |         |         |
| 271         | E | K                   | K       |         | D       | K       |         |         | K       |
| 272         | G |                     |         |         | S       |         |         |         | S       |
| 273         | Y | S                   | H       | H       | H       | H       |         |         | H       |
| 274         | L | P                   | P       | P       | P       | P       |         | P       | P       |
| 275         | S |                     | G/N     | N       |         |         |         |         |         |
| 276         | P | S                   |         |         |         | Q       |         |         |         |
| 278         | Q | L                   |         |         |         |         |         |         |         |
| 279         | V |                     |         | I       | I       |         |         |         |         |
| 280         | Y | H                   |         | H       |         | H       |         |         | H       |
| 284         | G |                     | D/S     |         |         |         |         |         | D       |
| 285         | Q |                     | R       |         |         |         |         |         |         |
| 287         | E |                     | G/K     | K       |         | D       |         |         |         |
| 289         | L |                     | P       |         | P       |         |         |         |         |
| 291         | S |                     |         |         |         | L       |         |         |         |
| 294         | S |                     | Y       |         |         | P       |         |         |         |
| 295         | E | K                   | K       | V       | G       |         |         |         |         |
| 296         | G |                     | S       |         |         |         |         |         | S       |
| 298         | L | P                   | P       | P       | P       | P       |         | P       | P       |
| 299         | S | I                   |         |         |         |         |         |         |         |
| 300         | P | S                   | S       |         |         |         |         |         |         |
| 303         | V |                     | A       | A       | I       | A       |         | A       | A       |
| 304         | Y |                     | H       | H       | H       | H       |         | H       | H       |
| 306         | T |                     | I       |         |         |         |         |         |         |
| 308         | E | K                   | K       |         |         |         |         |         |         |

| hRSV-A      |   | SURVEILLANCE SEASON |         |         |         |         |         |         |         |
|-------------|---|---------------------|---------|---------|---------|---------|---------|---------|---------|
| AA position |   | 2015/16             | 2016/17 | 2017/18 | 2018/19 | 2019/20 | 2020/21 | 2021/22 | 2022/23 |
| 310         | L | P                   | P       | P       | P       | P       |         | P       | P       |
| 311         | S |                     |         |         |         | P       |         |         | P       |
| 313         | S |                     |         |         |         |         |         | F       |         |
| 314         | L | P                   | P       |         |         | P       |         |         | P       |
| 317         | S |                     |         |         |         |         |         |         | F       |
| 319         | T | A                   | I       | I       |         | S       |         | I       | I       |
| 320         | T | I                   | A/K     | A       | A       | A       |         | A       | A       |
