# Supplementary material for: Molecular Epidemiology and Genetic Diversity of Human Respiratory Syncytial Virus in Sicily during Pre- and Post-COVID-19 Surveillance Seasons
Source: MDPI journal article supplement (doi:10.3390/pathogens12091099), 2023-08-28
Supplement: s1 [file s1]

**Table S1.** Amino acid changes identified in the Sicilian dataset of hRSV-A protein G gene sequences and relative frequency. AA substitution and position are defined in comparison with the ON1 prototype strain ON67-1210A (GenBank accession number: JN257693).

| Position   | Substitution | Frequency (%) | Position   | Substitution | Frequency (%) |
|------------|--------------|---------------|------------|--------------|---------------|
| <b>7</b>   | Q --> L/R    | 2.7           | <b>147</b> | T --> I      | 0.8           |
| <b>9</b>   | T --> A      | 2.7           | <b>149</b> | K --> R      | 0.8           |
| <b>26</b>  | I --> T      | 0.9           | <b>151</b> | R --> H      | 7.0           |
| <b>57</b>  | A --> V      | 5.4           | <b>152</b> | Q --> K      | 0.8           |
| <b>67</b>  | H --> N/Q    | 3.1           | <b>154</b> | K --> R      | 0.8           |
| <b>69</b>  | V --> F      | 0.8           | <b>161</b> | N --> D      | 0.8           |
| <b>71</b>  | L --> P      | 2.3           | <b>163</b> | F --> L      | 0.8           |
| <b>78</b>  | D --> N      | 0.8           | <b>173</b> | C --> W      | 0.8           |
| <b>80</b>  | T --> A/M    | 7.0           | <b>178</b> | N --> D/G    | 8.5           |
| <b>82</b>  | Q --> R      | 0.8           | <b>193</b> | K --> R      | 0.8           |
| <b>86</b>  | T --> I      | 0.8           | <b>200</b> | T --> I/P    | 2.3           |
| <b>93</b>  | Q --> L/R    | 1.6           | <b>206</b> | P --> Q      | 20.2          |
| <b>98</b>  | G --> E      | 0.8           | <b>209</b> | K --> R      | 7.0           |
| <b>99</b>  | I --> T      | 1.6           | <b>210</b> | T --> I/S    | 2.3           |
| <b>100</b> | S --> N      | 1.6           | <b>214</b> | D --> E      | 1.6           |
| <b>101</b> | F --> L/S    | 5.4           | <b>215</b> | P --> L/S    | 3.1           |
| <b>102</b> | S --> F/T    | 5.4           | <b>216</b> | K --> N/R    | 5.4           |
| <b>106</b> | G --> E      | 4.6           | <b>222</b> | P --> L      | 2.3           |
| <b>107</b> | T --> A      | 0.8           | <b>224</b> | E --> G/K/V  | 13.9          |
| <b>108</b> | T --> I      | 0.8           | <b>225</b> | V --> A      | 9.3           |
| <b>111</b> | S --> F/P    | 13.2          | <b>226</b> | L --> F/P    | 2.3           |
| <b>113</b> | T --> I      | 7.7           | <b>227</b> | T --> I      | 2.3           |
| <b>114</b> | I --> T      | 0.8           | <b>230</b> | P --> T      | 5.4           |
| <b>115</b> | L --> P      | 3.1           | <b>231</b> | T --> A      | 0.8           |
| <b>120</b> | P --> L      | 0.8           | <b>232</b> | G --> R      | 5.4           |
| <b>128</b> | S --> P/T    | 9.3           | <b>234</b> | P --> L      | 7.0           |
| <b>130</b> | T --> I      | 1.6           | <b>235</b> | T --> A      | 0.8           |
| <b>131</b> | V --> I/D    | 8.5           | <b>239</b> | T --> A      | 0.8           |
| <b>132</b> | K --> E      | 0.8           | <b>240</b> | K --> R/E    | 0.8           |
| <b>133</b> | I --> V/T    | 4.6           | <b>241</b> | T --> P      | 0.8           |
| <b>134</b> | K --> I      | 34.1          | <b>243</b> | I --> S      | 33.3          |
| <b>135</b> | N --> K/T    | 3.1           | <b>245</b> | T --> A      | 0.8           |
| <b>137</b> | T --> A      | 1.6           | <b>247</b> | L --> P/Q    | 8.5           |
| <b>140</b> | Q --> R      | 0.8           | <b>248</b> | L --> I      | 20.9          |
| <b>142</b> | L --> S      | 13.2          | <b>249</b> | T --> N      | 0.8           |
| <b>144</b> | S --> I      | 0.8           | <b>250</b> | S --> F      | 4.6           |
| <b>146</b> | P --> L/S/T  | 22.5          | <b>253</b> | K --> R      | 8.5           |
|            |              |               | <b>254</b> | G --> E/R    | 1.6           |

| Position | Substitution | Frequency (%) |
|----------|--------------|---------------|
| 255      | N --> D/S    | 3.1           |
| 256      | P --> S      | 3.1           |
| 257      | E --> K      | 3.1           |
| 258      | H --> Q/Y    | 20.9          |
| 262      | E --> K      | 34.1          |
| 263      | E --> G/K    | 8.5           |
| 265      | L --> F/I    | 6.2           |
| 266      | H --> L      | 7.7           |
| 267      | S --> L      | 3.1           |
| 270      | S --> F/P/Y  | 3.9           |
| 271      | E --> D/K    | 7.0           |
| 272      | G --> S      | 2.3           |
| 273      | Y --> H/S    | 7.7           |
| 274      | L --> P      | 58.1          |
| 275      | S --> G/N    | 3.1           |
| 276      | P --> Q/S    | 2.3           |
| 278      | Q --> L      | 2.3           |
| 279      | V --> I      | 1.6           |
| 280      | Y --> H      | 3.1           |
| 284      | G--> D/S     | 10.1          |
| 285      | Q --> R      | 4.6           |
| 287      | E --> D/G/K  | 2.3           |
| 289      | L --> P      | 5.5           |
| 291      | S --> L      | 11.7          |
| 294      | S --> P/Y    | 2.3           |
| 295      | E --> G/K/V  | 3.9           |
| 296      | G --> S      | 6.2           |
| 298      | L --> P/S    | 77.3          |
| 299      | S --> I      | 0.8           |
| 300      | P --> S      | 3.1           |
| 303      | V --> A/I    | 21.9          |
| 304      | Y --> H      | 57.0          |
| 306      | T --> I      | 1.6           |
| 308      | E --> K      | 2.3           |
| 310      | L --> P      | 29.5          |
| 311      | S --> P      | 7.0           |
| 313      | S --> F      | 3.9           |
| 314      | L --> P      | 25.6          |
| 317      | S --> F      | 6.2           |
| 319      | T --> A/I/S  | 13.2          |
| 320      | T --> A/I/K  | 34.1          |
