# Supplementary material for: Molecular Epidemiology and Genetic Diversity of Human Respiratory Syncytial Virus in Sicily during Pre- and Post-COVID-19 Surveillance Seasons
Source: MDPI journal article supplement (doi:10.3390/pathogens12091099), 2023-08-28
Supplement: s1 [file s1]

**Table S3.** Amino acid changes identified in the Sicilian dataset of hRSV-B protein G gene sequences and relative frequency. AA substitution and position are defined in comparison with the BA9 prototype strain BA4128/99B (GenBank accession number: AY333364).

| Position   | Substitution | Frequency (%) | Position   | Substitution | Frequency (%) |
|------------|--------------|---------------|------------|--------------|---------------|
| <b>5</b>   | K --> R      | 1.0           | <b>135</b> | G --> D/S    | 2.8           |
| <b>6</b>   | N --> S      | 1.0           | <b>136</b> | R --> I/T    | 99.4          |
| <b>18</b>  | D --> N      | 2.0           | <b>137</b> | T --> I      | 22.2          |
| <b>57</b>  | A --> T      | 1.2           | <b>138</b> | T --> S      | 100.0         |
| <b>69</b>  | V --> I      | 0.6           | <b>140</b> | P --> L/S    | 7.9           |
| <b>74</b>  | V --> I      | 0.6           | <b>142</b> | Q --> H/K    | 2.8           |
| <b>76</b>  | V --> I      | 4.0           | <b>143</b> | N --> K/S    | 1.1           |
| <b>87</b>  | I --> M/T    | 3.5           | <b>144</b> | N --> H      | 0.6           |
| <b>90</b>  | Y --> H      | 0.6           | <b>149</b> | K --> E      | 0.6           |
| <b>91</b>  | L --> P      | 8.6           | <b>152</b> | P --> S      | 0.6           |
| <b>94</b>  | V --> I      | 0.6           | <b>154</b> | N --> K      | 4.5           |
| <b>97</b>  | E --> D      | 0.6           | <b>156</b> | P --> S      | 1.1           |
| <b>98</b>  | R --> K      | 1.1           | <b>157</b> | K --> *      | 100.0         |
| <b>99</b>  | V --> A      | 0.6           | <b>159</b> | K --> *      | 100.0         |
| <b>100</b> | S --> G/N    | 10.3          | <b>171</b> | V --> I      | 0.5           |
| <b>102</b> | S --> P      | 0.6           | <b>174</b> | S --> G      | 0.5           |
| <b>105</b> | L --> P      | 100.0         | <b>175</b> | I --> V      | 1.1           |
| <b>106</b> | T --> I      | 0.5           | <b>177</b> | G --> S      | 0.5           |
| <b>107</b> | T --> A/D    | 99.4          | <b>192</b> | N --> S      | 0.5           |
| <b>108</b> | T --> A/P    | 2.3           | <b>194</b> | P --> Q      | 2.2           |
| <b>109</b> | P --> Q/S    | 2.3           | <b>199</b> | T --> A      | 0.5           |
| <b>110</b> | P --> L/S    | 2.3           | <b>200</b> | I --> T      | 100.0         |
| <b>112</b> | Y --> H/Q    | 99.4          | <b>204</b> | N --> K/T    | 1.7           |
| <b>113</b> | T --> I/M    | 1.0           | <b>205</b> | K --> Q      | 0.5           |
| <b>115</b> | S --> L/P    | 4.0           | <b>206</b> | P --> S      | 1.1           |
| <b>116</b> | A --> T      | 2.3           | <b>207</b> | P --> T      | 0.5           |
| <b>117</b> | T --> A      | 1.1           | <b>209</b> | K --> E      | 0.5           |
| <b>118</b> | I --> T      | 3.4           | <b>211</b> | T --> K      | 3.9           |
| <b>120</b> | P --> T      | 2.3           | <b>212</b> | N --> T      | 0.5           |
| <b>121</b> | N --> T      | 1.4           | <b>213</b> | K --> E      | 0.5           |
| <b>122</b> | T --> A      | 0.6           | <b>214</b> | R --> K      | 1.1           |
| <b>124</b> | S --> L      | 2.3           | <b>215</b> | D --> H/Y    | 3.3           |
| <b>126</b> | T --> A      | 1.4           | <b>216</b> | P --> L/S    | 12.1          |
| <b>128</b> | H --> Y      | 0.6           | <b>217</b> | K --> I      | 0.5           |
| <b>129</b> | T --> K      | 0.6           | <b>218</b> | K --> P/T    | 100.0         |
| <b>130</b> | T --> I      | 17.6          | <b>219</b> | L --> P      | 100.0         |
| <b>131</b> | A --> T      | 23.3          | <b>220</b> | A --> S      | 0.5           |
| <b>133</b> | T --> A      | 1.1           | <b>222</b> | T --> P      | 0.5           |

| Position | Substitution  | Frequency (%) |
|----------|---------------|---------------|
| 223      | L --> M/P/S/T | 89.5          |
| 224      | K --> E       | 0.5           |
| 225      | K --> E       | 1.1           |
| 227      | T --> A/N     | 19.3          |
| 228      | T --> A       | 1.7           |
| 229      | I --> T       | 7.7           |
| 231      | P --> L/S     | 5.5           |
| 232      | T --> A       | 0.5           |
| 233      | K --> R       | 0.5           |
| 234      | K --> N       | 0.5           |
| 236      | T --> I       | 0.5           |
| 237      | P --> L/S     | 2.2           |
| 239      | T --> I       | 0.5           |
| 240      | T --> K       | 1.7           |
| 243      | D --> G/N     | 3.9           |
| 244      | T --> S       | 0.5           |
| 245      | S --> N       | 1.7           |
| 247      | S --> P       | 98.3          |
| 249      | S --> P       | 2.2           |
| 251      | V --> A/M     | 2.2           |
| 252      | L --> F/P     | 2.2           |
| 254      | T --> I       | 73.5          |
| 255      | T --> N       | 0.5           |
| 256      | T --> I/S     | 2.2           |
| 257      | S --> P       | 2.8           |
| 258      | K --> N/R     | 9.4           |
| 259      | H --> Q       | 0.5           |
| 260      | T --> K       | 0.5           |
| 261      | E --> K       | 1.1           |
| 263      | D --> E/N/Y   | 2.2           |
| 267      | S --> L/P     | 12.7          |
| 269      | S --> F       | 1.7           |
| 270      | T --> A/I     | 79.0          |
| 271      | V --> A       | 91.7          |
| 272      | L --> F/P     | 9.4           |
| 277      | S --> P       | 8.3           |
| 281      | I --> T       | 99.4          |
| 282      | Q --> L       | 1.1           |
| 284      | Q --> L       | 2.2           |
| 285      | S --> F/P     | 1.7           |
| 286      | L --> P       | 5.0           |
| 287      | H --> Y       | 76.8          |

| Position | Substitution  | Frequency (%) |
|----------|---------------|---------------|
| 290      | T --> I       | 39.2          |
| 291      | P --> S       | 1.7           |
| 292      | E --> K/Q     | 1.1           |
| 296      | N --> S/F     | 1.1           |
| 297      | S --> M       | 0.5           |
| 302      | T --> A/I     | 1.1           |
| 303      | A --> P/T     | 10.5          |
| 304      | S --> F       | 2.2           |
| 305      | E --> D/K     | 3.9           |
| 306      | P --> S       | 0.5           |
| 307      | S --> P/Y     | 1.1           |
| 308      | T --> I       | 0.5           |
| 309      | S --> P       | 0.5           |
| 312      | T --> A/F/I/N | 32.6          |
| 313      | Q --> *       | 84.0          |
| 314      | K --> R       | 87.3          |
| 316      | * --> Q       | 92.8          |
| 317      | S --> P       | 1.1           |
| 318      | Y --> C       | 0.5           |
| 322      | F --> I/S     | 1.1           |
